# Supplementary material for: Enlarged Centrum Semiovale Perivascular Spaces as a Non- Invasive Imaging Marker of Vascular Amyloid Deposition in Amyloid-Positive Individuals Without CAA-Related Hemorrhages
Source: Research Square preprint supplement (doi:10.21203/rs.3.rs-7661793/v1), 2025-10-21
Supplement: Supplementary file 1 [file 06d35d9eff16a3d61d24acf2.xlsx]

## Sheet: Table1
	Table1. Demographics of the participants
	Characteristics
	Overall (n)	30
	Female Sex, no. (%)	18 (60.0)
	MCI due to AD, no. (%)	24 (80.0)
	mild AD, no. (%)	6 (20.0)
	Age, y, mean ± SD	74.0 ± 5.94
	CSF Aβ40, pg/mL, mean ± SD	15528.6 ± 3384.1
	CSF Aβ42, pg/mL, mean ± SD	713 ± 200.6
	CSF p-tau 181, pg/mL, mean ± SD	98.1 ± 200.6
	CSF Aβ42/40, mean ± SD	0.0463 ± 0.0097
	CSF Aβ42x40, mean ± SD	11512611 ± 5296849
	SD: standard deviation
	MCI due to AD refers to participants with a Clinical Dementia Rating (CDR) score of 0.5.
