# Supplementary material for: Enlarged Centrum Semiovale Perivascular Spaces as a Non- Invasive Imaging Marker of Vascular Amyloid Deposition in Amyloid-Positive Individuals Without CAA-Related Hemorrhages
Source: Research Square preprint supplement (doi:10.21203/rs.3.rs-7661793/v1), 2025-10-21
Supplement: Supplementary file 2 [file 090ae4768adecf198fec99f0.xlsx]

## Sheet: Supplmentaly Figure用
Low degree group	Age	Gender	Aβ42	Aβ40	p-tau	Aβ42/40 ratio	Aβ42x40 product	CSO-PVS	CSO-PVS counts by TK	CSO-PVS counts by KA	CDR	Clinical Diagnosis	MMSE	Hypertention	Dyslipidemia	Diabetes	Atrial fibrilation	Stroke	ARIA E/H within 6 month treatment	CDR	ApoE haplotype	ApoE carriers
	78	M	649	14735	101	0.044	9563015	Low grade	0	0	0.5	MCI due to AD	20	(-)	(-)	(-)	(-)	(-)	(-)	0.5
	75	M	1008	21818	124	0.046	21992544	Low grade	0	0	1	mild AD	23	(+)	(+)	(-)	(-)	(-)	(-)	1
	72	M	565	13601	188	0.042	7684565	Low grade	1	1	0.5	MCI due to AD	26	(-)	(-)	(-)	(-)	(-)	(-)	0.5
	67	F	1296	20848	111	0.062	27019008	Low grade	2	5	0.5	MCI due to AD	26	(-)	(+)	(-)	(-)	(-)	(-)	0.5
	61	M	525	10287	80.2	0.051	5400675	Low grade	2	4	0.5	MCI due to AD	25	(-)	(-)	(-)	(-)	(-)	(-)	0.5
	73	M	725	12863	99.2	0.056	9325675	Low grade	4	6	0.5	MCI due to AD	22	(-)	(-)	(-)	(-)	(-)	(-)	0.5
	70	F	869	21173	164	0.041	18399337	Low grade	5	8	0.5	MCI due to AD	22	(-)	(-)	(+)	(-)	(-)	(-)	0.5
	81	F	925	17975	143	0.051	16626875	Low grade	5	9	0.5	MCI due to AD	28	(-)	(-)	(-)	(-)	(-)	(-)	0.5
	75	M	753	17244	93.9	0.044	12984732	Low grade	7	9	0.5	MCI due to AD	20	(+)	(-)	(-)	(-)	(-)	(-)	0.5
	78	F	607	14870	68.8	0.041	9026090	Low grade	8	2	0.5	MCI due to AD	25	(+)	(-)	(-)	(-)	(-)	(-)	0.5
	75	F	721	23650	219	0.03	17051650	Low grade	8	8	0.5	MCI due to AD	23	(-)	(-)	(-)	(-)	(-)	(-)	0.5
	83	F	1156	18410	52.7	0.063	21281960	Low grade	8	13	0.5	MCI due to AD	27	(-)	(-)	(-)	(-)	(+)	(-)	0.5
	82	F	789	13892	57	0.057	10960788	Low grade	9	6	0.5	MCI due to AD	23	(-)	(-)	(-)	(-)	(-)	(-)	0.5
	76	F	768	17608	78.6	0.044	13522944	Low grade	9	6	1	mild AD	21	(+)	(-)	(-)	(-)	(-)	(-)	1
	70	M	580	16486	165	0.035	9561880	Low grade	9	6	0.5	MCI due to AD	23	(+)	(+)	(-)	(-)	(-)	(+)	0.5
Mean	74.4	8	795.733	17030.7	116.36	0.0471333	1.40268e+07				13		23.6	5	3	1	0	1	1			9
SD	5.68976	(Number of Female participants)	214.577	3617.86	48.1012	0.00913504	5.95684e+06				(Number of MCI cases)		2.38886
Min	61		525	10287	52.7	0.03	5400675						20
Max	83		1296	23650	219	0.063	27019008						28
High degree group	Age	Gender	Aβ42	Aβ40	p-tau	Aβ42/40 ratio	Aβ42x40 product	CSO-PVS	CSO-PVS counts by TK	CSO-PVS counts by KA	CDR	Clinical Diagnosis	MMSE	Hypertention	Dyslipidemia	Diabetes	Atrial fibrilation	Stroke	ARIA E/H within 6 month treatment	CDR	ApoE haplotype	ApoE carriers
	75	F	646	16377	94.8	0.039	10579542	High grade	9	11	0.5	MCI due to AD	24	(-)	(-)	(-)	(-)	(-)	(-)	0.5
	79	F	673	13678	129	0.049	9205294	High grade	10	13	0.5	MCI due to AD	23	(+)	(-)	(-)	(-)	(+)	(-)	0.5
	81	F	522	15112	68.3	0.035	7888464	High grade	10	10	1	mild AD	26	(-)	(-)	(-)	(-)	(-)	(+)	1
	78	F	774	13264	44.7	0.058	10266336	High grade	11	1	0.5	MCI due to AD	24	(-)	(-)	(-)	(-)	(-)	(-)	0.5
	66	F	767	15668	76.3	0.049	12017356	High grade	11	10	0.5	MCI due to AD	29	(-)	(-)	(-)	(-)	(-)	(-)	0.5
	70	F	681	18251	123	0.037	12428931	High grade	11	13	1	mild AD	23	(-)	(-)	(-)	(-)	(-)	(+)	1
	77	F	863	12636	46.1	0.068	10904868	High grade	12	7	1	mild AD	27	(+)	(-)	(-)	(-)	(-)	(-)	1
	79	M	483	9520	43.6	0.051	4598160	High grade	13	9	1	mild AD	26	(-)	(-)	(-)	(-)	(-)	(-)	1
	81	M	600	11972	80.8	0.05	7183200	High grade	15	17	0.5	MCI due to AD	23	(+)	(-)	(-)	(+)	(-)	(-)	0.5
	70	F	397	11650	52.2	0.034	4625050	High grade	15	20	0.5	MCI due to AD	29	(-)	(+)	(-)	(-)	(-)	(+)	0.5
	74	M	730	17987	92.8	0.041	13130510	High grade	15	10	0.5	MCI due to AD	24	(-)	(-)	(-)	(-)	(-)	(-)	0.5
	57	F	735	14369	92.1	0.051	10561215	High grade	16	13	0.5	MCI due to AD	23	(-)	(-)	(-)	(-)	(-)	(-)	0.5
	71	M	349	12127	67.8	0.029	4232323	High grade	17	12	0.5	MCI due to AD	24	(+)	(+)	(-)	(-)	(-)	(-)	0.5
	74	F	739	14024	73.1	0.053	10363736	High grade	20	16	0.5	MCI due to AD	29	(-)	(-)	(-)	(-)	(-)	(-)	0.5
	72	M	508	13763	113	0.037	6991604	High grade	25	26	0.5	MCI due to AD	29	(+)	(+)	(-)	(-)	(-)	(-)	0.5
Mean	73.6	10	631.133	14026.5	79.84	0.0454	8.99844e+06				11		25.5333	5	3	0	1	1	3			11
SD	6.16225	(Number of Female participants)	144.613	2302.72	26.7191	0.0101509	2.82615e+06				(Number of MCI cases)		2.39072
Min	57		349	9520	43.6	0.029	4232323						23
Max	81		863	18251	129	0.068	13130510						29
Note: Participants may be identifiable because of small-scale, single institute study. Therefore, ApoE haplotype of the participants cannot be disclosed.
