# Supplementary material for: Enlarged Centrum Semiovale Perivascular Spaces as a Non- Invasive Imaging Marker of Vascular Amyloid Deposition in Amyloid-Positive Individuals Without CAA-Related Hemorrhages
Source: Research Square preprint supplement (doi:10.21203/rs.3.rs-7661793/v1), 2025-10-21
Supplement: Supplementary file 3 [file caee106b883b2e6d86cc33e8.xlsx]

## Sheet: Table2
	Table2. Clinical Characteristics between Low and High-degree groups
	Characteristics	Low-degree group		High-degree group
			p value
	Overall	15		15
	Female Sex, no. (%)	8 (53.3)	0.7104	10 (66.7)
	Age, y, mean ± SD	74.4 ± 5.7	0.7662	73.6 ± 6.2
	Medical history, no (%)
	Hypertension	5 (33.3)	>0.9999	5 (33.3)
	Dyslipidemia	3 (20.0)	>0.9999	3 (20.0)
	Diabetes	1 (6.7)	>0.9999	0 (0)
	Atrial fibrilation	0 (0)	>0.9999	1 (6.7)
	stroke	1 (6.7)	>0.9999	1 (6.7)
	Diagnosis, no of MCI due to AD. (%)	13 (86.7)	0.4100	11 (73.3)
	MMSE-J	23.6 ± 2.4	0.0390	25.5 ± 2.4
	ApoE4 haplotype , no (%)
	E3/3	6 (40.0)	0.6999	4 (26.7)
	E3/4	7 (46.7)	0.7152	9 (60.0)
	E4/4	2 (13.3)	>0.9999	2 (13.3)
	ARIA E/H within 6 month treatment	1 (6.7)	0.5977	3 (20.0)
	SD: standard deviation
	MCI due to AD refers to participants with a Clinical Dementia Rating (CDR) score of 0.5.
	MMSE-J: Minimental Scale Examination-J
	The intergroup comparisons for age and MMSE were conducted using the Mann-Whitney U test.
	Fisher’s exact test were used for all other categorical variables.
